# Supplementary material
Source: publisher site journal article supplement (https://www.dovepress.com/article/602859)

**Supporting information 1. srqr statement-checklist**

SRQR Statement—Standards for Reporting Qualitative Research (SRQR)

| **No.** | **Topic** | **Item** | **Page No** |
| --- | --- | --- | --- |
|  | **Title and abstract** |  |  |
| S1 | Title | Concise description of the nature and topic of the study ldentifying the study as qualitative or indicating the approach (e.g. ethnoqraphy, grounded theory) or data collection methods (e.g., interview, focusgroup) is recommended | 1 |
| S2 | Abstract | Summary of key elements of the study using the abstract format of the intended publication; typically includes background, purpose, methods, results, and conclusions | 2 |
|  | **Introduction** |  |  |
| S3 | Problem formulation | Description and significance of the problem/phenomenon studied, review of relevant theory and empirical work; problem statement | 3, 4 |
| S4 | Purpose or research question | Purpose of the study and specific objectives or questions | 4 |
|  | **Methods** |  |  |
| S5 | Qualitative approach and research paradigm | Qualitative approach (e.g., ethnography, grounded theory, case study, phenomenology, narrative research) and guiding theory if appropriate identifying the research paradigm (e.g., postpositivist, constructivist/interpretivist) is also recommended; rationaleb | 4, 5 |
| S6 | Researcher characteristics and reflexivity | Researchers' characteristics that may influence the research, including personal attributes, qualifications/experience, relationship with participants, assumptions, and/or presuppositions; potential or actual interaction between researchers’characteristics and the research questions, approach, methods, results, and/or transferability | 6, 7, 8-12 |
| S7 | Context | Setting/site and salient contextual factors; rationaleb | 7, 8 |
| S8 | Sampling strategy | How and why research participants, documents, or events were selected; criteria for deciding when no further sampling was necessary (e.g.,sampling saturation); rationaleb | 5, 6 |
| S9 | Ethical issues pertaining to human subjects | Documentation of approval by an appropriate ethics review board and participant consent, or explanation for lack thereof: other confidentiality and data security issues | 12, 27 |
| S10 | Data collection methods | Types of data collected; details of data collection procedures including (as appropriate) start and stop dates of data collection and analysis, iterative process, trianaulation of sources/methods, and modification of procedures in response to evolving study findings; rationaleb | 7-10 |
| S11 | Data collection instruments and technologies | Description of instruments (e.g., interview guides, questionnaires) and devices (e.g., audio recorders) used for data collection; if/how theinstrument(s) changed over the course of the study | 6,7 |
| S12 | Units of study | Number and relevant characteristics of participants, documents, or events included in the study; level of participation (could be reported in results) | 11,25 |
| S13 | Data processing | Methods for processing data prior to and during analysis, including transcription, data entry, data management and security, verification of data integrity, data coding, and anonymization/deidentification of excerpts | 7-12 |
| S14 | Data analysis | Process by which inferences, themes, etc., were identified and developed, including the researchers involved in data analysis; usually references a specific paradigm or approach; rationaleb | 9, 10 |
| S15 | Techniques to enhance trustworthiness | Techniques to enhance trustworthiness and credibility of data analysis (e.g., member checking, audit trail, triangulation); rationaleb | 9-11 |
|  | **Results/findings** |  |  |
| S16 | Synthesis and interpretation | Main findings (e.g. interpretations, inferences, and themes); might include development of a theory or model, or integration with prior research or theory | 12-19 |
| S17 | Links to empirical data | Evidence (e.g. quotes, field notes, text excerpts, photographs) to substantiate analytic findings | / |
|  | **Discussion** |  |  |
| S18 | Integration with prior work, implications, transferability, and contribution(s) to the field | Short summary of main findings; explanation of how findings and conclusions connect to, support, elaborate on, or challenge conclusions of earlier scholarship; discussion of scope of application/generalizability; identification of unique contribution(s) to scholarship in a discipline or field | 18, 19 |
| S19 | Limitations | Trustworthiness and limitations of findings | 25, 26 |
|  | **Other** |  |  |
| S20 | Conflicts of interest | Potential sources of influence or perceived influence on study conduct and conclusions; how these were managed | 28 |
| S21 | Funding | Sources of funding and other support; role of funders in data collection, interpretation, and reporting | 28 |

b The rationale should briefly discuss the justification for choosing that theory, approach, method, or technique rather than other options available, the assumptions and limitations implicit in those choices, and how those choices influence study conclusions and transferability. As appropriate, the rationale for several items might be discussed together.

**Supporting information 2. informed consent form and research questionnaires**

**Patients consent form**

Dear Patient:

You are being invited to participate in a clinical trial. This informed consent document provides you with information to help you decide whether to take part in this clinical trial. Please read it carefully and, should you have any questions, do not hesitate to ask the investigator responsible for this trial.

This study has been reviewed and approved for clinical research by the Ethics Committee of Chengdu Public Health Clinical Medical Centre.

Before deciding whether to participate in this study, please read the following information as carefully as possible. It will help you understand the nature of the research and its purpose, the procedures and duration involved, as well as the potential benefits, risks, and discomforts you may experience as a participant. Should you wish, you may discuss this with a relative or friend, or ask the researcher to explain it to you to assist in your decision-making.

**Study Purpose:**This study aims to explore, from a qualitative research perspective, the authentic experiences and needs of newly diagnosed tuberculosis patients during hospital-to-home transition periods. It systematically identifies and analyses the facilitating and impeding factors influencing discharge preparation during this transitional phase. Ultimately, it seeks to provide scientific evidence and practical guidance for optimising standardised discharge preparation protocols for newly diagnosed tuberculosis patients during hospital-to-home transitions, thereby enhancing continuity of care throughout this critical period.

**Research Process:**Following your informed consent, we shall arrange an appointment by telephone for the interview time and location. Each interview will be conducted for approximately 30 to 60 minutes. To ensure the completeness of the information gathered, we shall record your interview. Additionally, certain aspects of the discussion will be noted during the interview process.

**Risks and Discomfort：**During the interview, you may experience emotional fluctuations. The researcher will halt the interview and provide reassurance as appropriate. Should you require further psychological support, the research team will arrange professional counselling and assistance for you.

**Beneficiar：**By agreeing to participate in this study, you will receive professional counselling and information support throughout the follow-up period. Furthermore, the information you provide to the researchers will serve as a valuable reference for other patients with similar conditions and for healthcare professionals. It will also provide essential evidence for developing hospital-to-home transition discharge preparation programmes for newly diagnosed tuberculosis patients.

**Confidentiality of Personal Information：**Any relevant recordings will remain confidential, and the public report of the research findings will not disclose your personal identity. We shall make every effort to protect your personal privacy within the bounds of the law.

**voluntary participation：**Participation in this research is entirely voluntary. You may decline to take part in this study or withdraw at any point during its course without this affecting your relationship with your doctor, your medical care, or any other benefits to which you are entitled.

**What should I do now?**Whether to participate in this study is entirely your decision (and that of your family). Before deciding to take part, please ask the researcher any questions you may have.

Thank you for reading the above material. Should you decide to participate in this study, please inform the researcher, who will arrange all matters pertaining to the study for you. Please retain this information.

**Consent Signature Page**

I have read this informed consent form.

I understand the potential risks and benefits associated with participating in this study.

I understand that participation in this research is voluntary, and I confirm that I have had sufficient time to consider this.

I may withdraw from this study at any time without facing discrimination or reprisals, and my medical treatment and rights shall remain unaffected.

I shall receive a copy of the signed and dated informed consent form.

Finally, I decided to agree to participate in this study.

Signature of the subject:_____________________

Date:

I confirm that I have explained the details of this study to the patient, including their rights and the potential benefits and risks, and have provided them with a copy of the signed informed consent form.

Signature of the researcher:_____________________

Date:

**Supporting information 3. General information Questionnaire:**


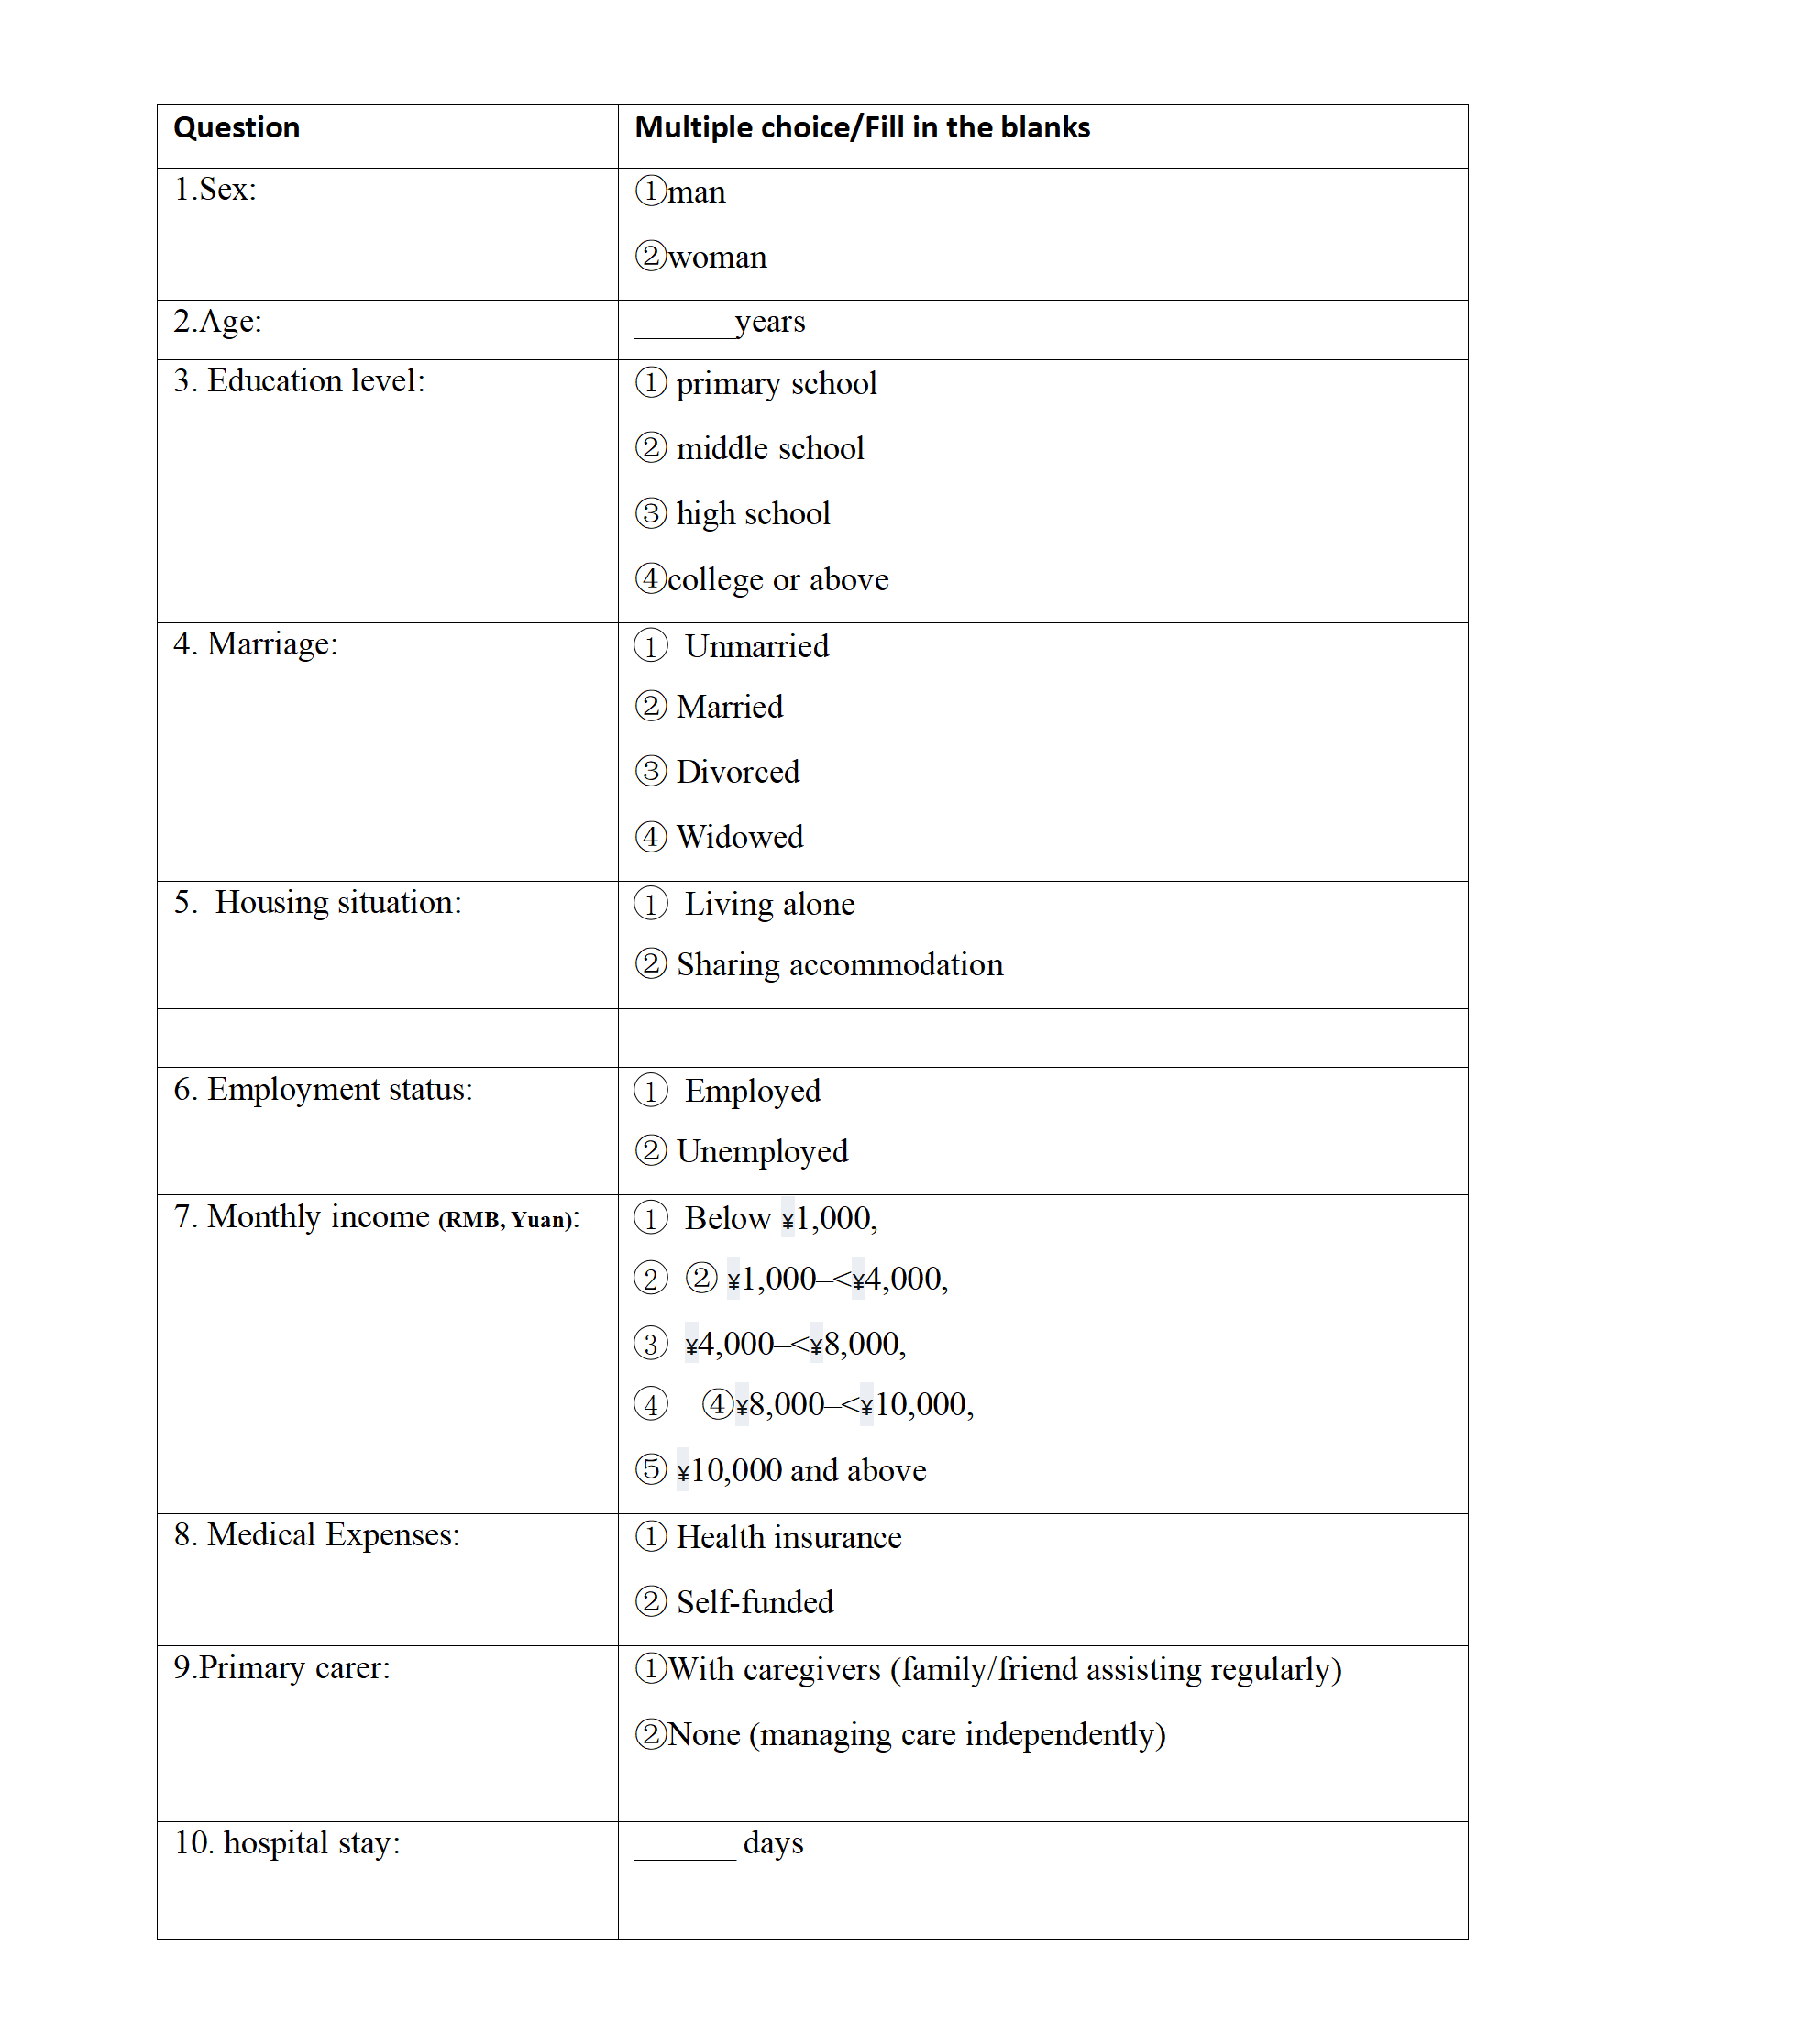

Supplement: Supplementary file 1 [file 602859%20Supporting%20Information.docx]
